# Supplementary material for: Deracemisation and stereoinversion by a nanoconfined bidirectional enzyme cascade: dual control by electrochemistry and selective metal ion activation
Source: Royal Society of Chemistry journal article supplement (doi:10.1039/d2cc03638j), 2022-01-01

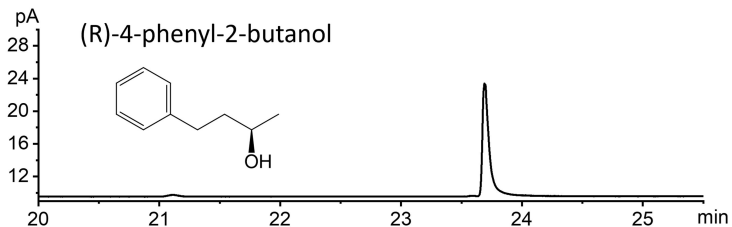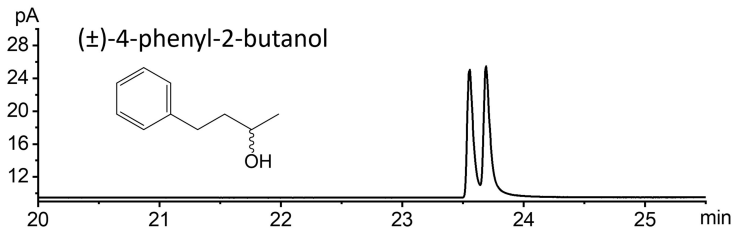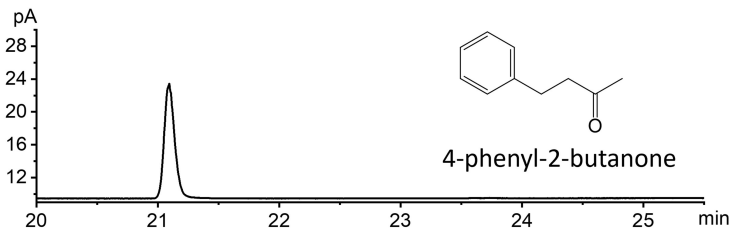

Supplement: d2cc03638j2.pdf [file d2cc03638j2.pdf]
